# Supplementary material for: Samidorphan mitigates olanzapine-induced weight gain and metabolic dysfunction in rats and non-human primates
Source: PubMed Central journal article supplement — J Psychopharmacol. 2019 Jul 11;33(10):1303–16. doi: 10.1177/0269881119856850 (PMC6764014; doi:10.1177/0269881119856850), 2019-07-11
Supplement: Supplemental_Data.pdf [file Supplemental_Data.pdf]

## Supplemental Data

### Supplemental Data Figure 1

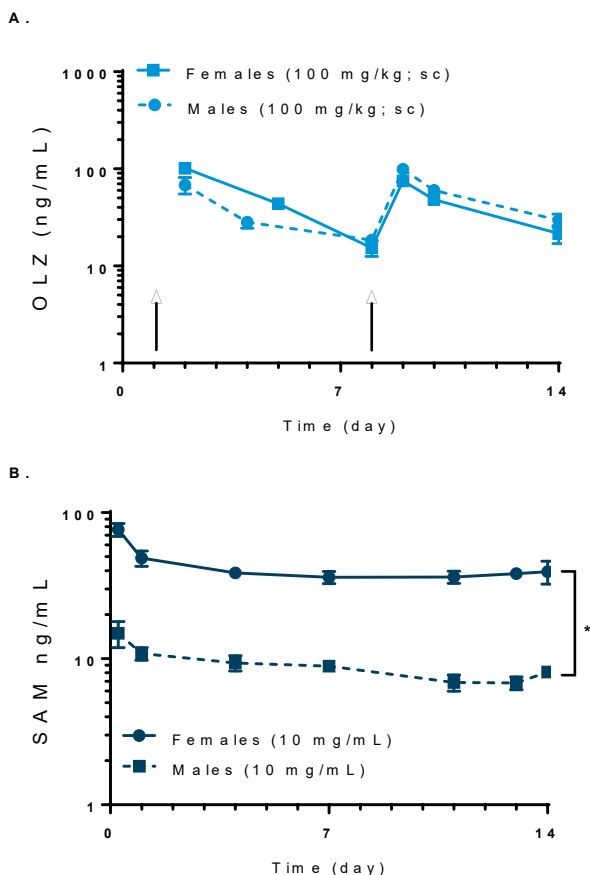

#### Pilot PK studies

Based on clinical  $C_{max}$  steady state plasma levels of ALKS 3831 (Sun et al., 2018), pilot studies were designed to target clinically relevant plasma concentrations of OLZ and SAM in rodents. A. The dose of OLZ (100 mg/kg) was chosen based on previously reports which delivered clinically relevant and stable concentrations in female rats (Skrede et al., 2014). Average steady state values under these conditions were (mean  $\pm$  SEM)  $51.0 \pm 12.6$  mg/mL and  $50.7$  ng/mL  $\pm$   $13.4$  for females and males, respectively. Importantly as determined by an unpaired two-tailed  $t$  test, there were no differences in average plasma concentrations between female and male rats ( $t_{(10)} = 0.02$ ,  $p = 0.99$ ). B. Female and male rats were implanted with Alzet® osmotic mini pumps (model 2ML2; 5  $\mu$ L/hr) filled with 10 mg/mL of SAM. Steady state concentrations achieved were  $44.8$  ng/mL  $\pm$   $5.2$  and  $9.4 \pm 1.1$  ng/mL for females and males, respectively and average concentration of SAM in males was significantly lower compared to females ( $t_{(12)} = 6.31$ ,  $p < 0.0001$ ). The results of these studies were used to extrapolate the pump concentrations of SAM used in future experiments. Arrows indicate time of OLZ injection.

## Supplemental Data Figure 2

### A. Muscle Tissue

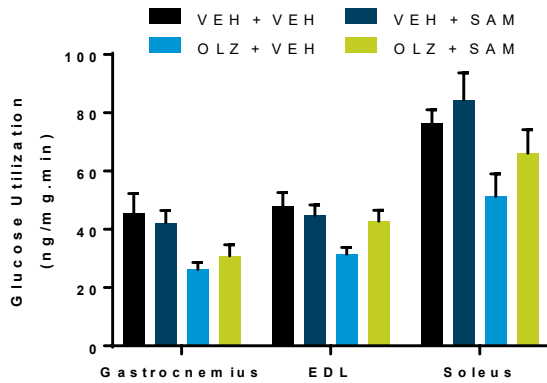

### B. Adipose Tissue

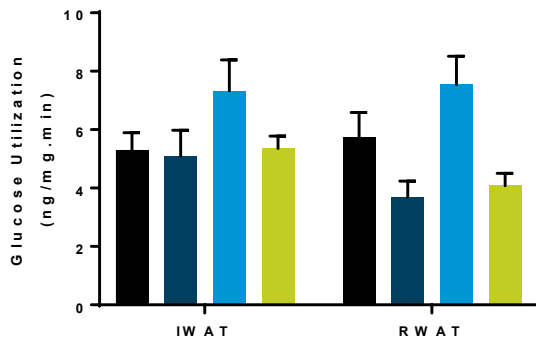

### Tissue-specific glucose utilization

A. Glucose utilization for gastrocnemius, extensor digitorum longus (EDL) and soleus muscle tissues. B. Glucose utilization for inguinal (iWAT) and retroperitoneal (rWAT) adipose tissues. The net effect of OLZ, SAM alone and in combination are analyzed and shown in figure 4 in the manuscript. Data are expressed as mean  $\pm$  (SEM)
